# Supplementary material for: Pressure-induced evolution of structures and promising superconductivity of ScB6
Source: Royal Society of Chemistry journal article supplement (doi:10.1039/d2cp00711h), 2022-01-01
Supplement: d2cp00711h1.pdf [file d2cp00711h1.pdf]

Supplementary Information for the paper entitled “Pressure  
induced evolution of structures and Promising Superconductivity of  
ScB<sub>6</sub>”

Junyi Du<sup>†</sup>, Xiaofeng Li<sup>‡</sup>, and Feng Peng<sup>‡,\*</sup>

---

**Table S1** The crystal structural information of ScB<sub>6</sub> under pressure

<sup>†</sup> College of Mathematical Science, Luoyang Normal University

<sup>‡</sup> College of Physics and Electronic Information & Henan Key Laboratory of Electromagnetic Transformation and Detection, Luoyang

Normal University, Luoyang 471934, China. \* Corresponding author. Email: [fpeng@calypso.cn](mailto:fpeng@calypso.cn) or [fpeng@lynu.edu.cn](mailto:fpeng@lynu.edu.cn)

| phase                      | Lattice constants (Å)          | Atom    | Atomic | Positions |       |
|----------------------------|--------------------------------|---------|--------|-----------|-------|
| P2 <sub>1</sub> /m<br>0GPa | a =5.740                       | Sc (2e) | 0.278  | 0.25      | 0.883 |
|                            | b =4.488                       | B (4f)  | 0.291  | 0.545     | 0.341 |
|                            | c =5.004                       | B (4f)  | 0.016  | 0.449     | 0.663 |
|                            | $\alpha=\gamma=90^\circ$       | B (2e)  | 0.791  | 0.25      | 0.307 |
|                            | $\beta=65.1^\circ$             | B (2e)  | 0.505  | 0.25      | 0.264 |
| C2/m<br>500GPa             | a =7.086                       | Sc (4i) | 0.179  | 0         | 0.716 |
|                            | b =2.392                       | B (4i)  | 0.042  | 0         | 0.173 |
|                            | c =7.591                       | B (4i)  | 0.348  | 0         | 0.057 |
|                            | $\alpha=\gamma=90^\circ$       | B (4i)  | 0.867  | 0         | 0.954 |
|                            | $\beta=121.8^\circ$            | B (4i)  | 0.037  | 0.5       | 0.273 |
|                            |                                | B (4i)  | 0.666  | 0.5       | 0.411 |
|                            |                                | B (4i)  | 0.912  | 0.5       | 0.519 |
| Cmcm<br>800GPa             | a =2.249                       | Sc (4c) | 0.5    | 0.095     | 0.75  |
|                            | b =9.672                       | B (8f)  | 0      | 0.203     | 0.056 |
|                            | c =4.296                       | B (8f)  | 0      | 0.944     | 0.912 |
|                            | $\alpha=\beta=\gamma=90^\circ$ | B (4c)  | 0      | 0.249     | 0.75  |
|                            |                                | B (4c)  | 0.5    | 0.107     | 0.25  |

Table S2 The calculated bulk modulus  $B$  (GPa), shear modulus  $G$  (GPa), Young's modulus  $Y$  (GPa),  $B/G$ ,

Poisson's ratio  $\nu$ , and hardness  $H_V$  (GPa) of three phases of  $\text{ScB}_6$  in comparison with available theoretical and experimental results.

| structure                    | work      | $B$   | $G$   | $Y$   | $G/B$ | $\nu$ | $H_V$ |
|------------------------------|-----------|-------|-------|-------|-------|-------|-------|
| $\text{P2}_1/\text{m-ScB}_6$ | this work | 174   | 126   | 303   | 0.722 | 0.209 | 20.2  |
| $\text{C2/m-ScB}_6$          | this work | 220   | 156   | 379   | 0.707 | 0.214 | 16.2  |
| $\text{Cmcm-ScB}_6$          | this work | 205   | 164   | 388   | 0.797 | 0.185 | 27.3  |
| $\text{C2/m-ScB}_3$          | Ref 25    | 199   | 189   | 430   | 0.948 | 0.139 | 37.1  |
| $\text{P6/mmm-ScB}_2$        | Ref 23    | 191   | 194   | 435   | 1.017 | 0.12  | 41.4  |
| $\text{P6/mmm-ScB}_2$        | Ref 43    | 198.9 | 201.4 | 451.8 | 1.013 | 0.121 | 42.1  |
| $\text{P6/mmm-ScB}_2$        | Exp 43    |       |       |       |       |       | 17.46 |
| $\text{Fm-3m-ScB}_{12}$      | Ref 23    | 219   | 194   | 450   | 0.887 | 0.157 | 34.4  |
| $\text{R-3m-ScB}$            | Ref 23    | 109   | 74    | 181   | 0.678 | 0.224 | 12.7  |
| $\alpha\text{-BeB}_6$        | Ref 12    | 222   | 227   | 508   | 1.02  | 0.12  | 46.0  |

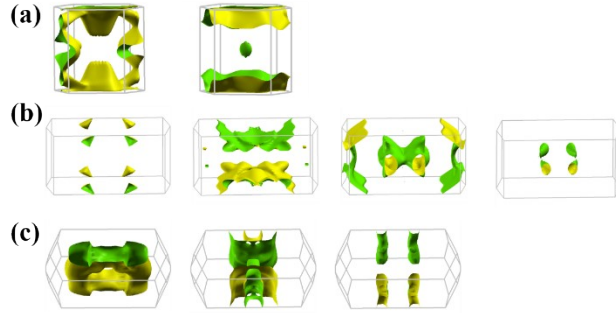

Fig.S1 The Fermi surface (a)  $P2_1/m$  at 0GPa (b)  $C2/m$  at 500GPa (c)  $Cmcm$  at 800GPa.

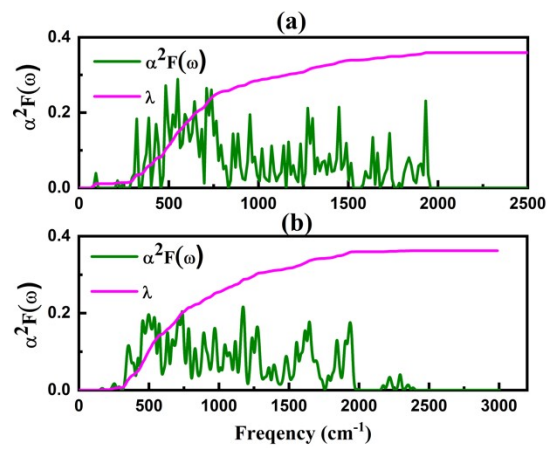

Fig.S2 The Eliashberg EPC spectral function  $\alpha^2F(\omega)$ , and the cumulative EPC integral  $\lambda(\omega)$  of  $C2/m$ - and  $Cmcm$ - $ScB_6$  at 500GPa and 800GPa, respectively.
